# Supplementary material for: Assessing “Dangerous Climate Change”: Required Reduction of Carbon Emissions to Protect Young People, Future Generations and Nature
Source: PLoS One. 2013 Dec 3;8(12):e81648. doi: 10.1371/journal.pone.0081648 (PMC3849278; doi:10.1371/journal.pone.0081648)
Supplement: Table S1 — (ODS) [file pone.0081648.s001.ods]

## Sheet: Case_SI_table1_indiv_net_F
	Global Mean Effective Radiative Forcing (W/m^2)
	Human-made Greenhouse Gases			Human-made Aerosols				Other Human-made	Natural		Net Forcing
Year	Well-Mixed GHGs	O3	Stratospheric H2O	Tropospheric Reflective Aerosols	Aerosol Indirect Effect	Snow Albedo	Black Carbon	Land Use Albedo	Solar	Stratospheric Volcanic Aerosols	(Sum of all forcings)
1880	0.00	0.00	0.00	0.00	0.00	0.00	0.00	0.00	0.00	0.00	0.00
1881	0.01	0.00	0.00	0.00	-0.01	0.00	0.00	0.00	0.02	0.01	0.04
1882	0.03	0.00	0.00	-0.01	-0.01	0.00	0.01	0.00	0.03	0.02	0.07
1883	0.04	0.00	0.00	-0.01	-0.02	0.00	0.01	0.00	0.03	-1.09	-1.03
1884	0.05	0.00	0.00	-0.02	-0.03	0.00	0.01	0.00	0.01	-3.33	-3.29
1885	0.06	0.00	0.00	-0.02	-0.03	0.01	0.02	0.00	-0.01	-1.47	-1.45
1886	0.07	0.00	0.00	-0.03	-0.04	0.01	0.02	0.00	-0.04	-0.83	-0.84
1887	0.08	0.00	0.00	-0.03	-0.04	0.01	0.02	-0.01	-0.06	-0.85	-0.87
1888	0.08	0.01	0.00	-0.04	-0.05	0.01	0.03	-0.01	-0.06	-0.49	-0.52
1889	0.08	0.01	0.00	-0.04	-0.06	0.01	0.03	-0.01	-0.07	-0.64	-0.68
1890	0.09	0.01	0.00	-0.05	-0.06	0.01	0.03	-0.01	-0.06	-0.89	-0.92
1891	0.10	0.01	0.00	-0.05	-0.07	0.01	0.04	-0.01	-0.02	-0.69	-0.68
1892	0.10	0.01	0.00	-0.06	-0.08	0.01	0.04	-0.01	0.00	-0.48	-0.45
1893	0.10	0.01	0.00	-0.06	-0.08	0.02	0.04	-0.01	0.02	-0.19	-0.15
1894	0.11	0.01	0.00	-0.06	-0.09	0.02	0.04	-0.01	0.04	-0.05	0.01
1895	0.11	0.01	0.00	-0.07	-0.09	0.02	0.05	-0.01	0.03	-0.01	0.03
1896	0.11	0.01	0.01	-0.07	-0.10	0.02	0.05	-0.01	0.00	-0.40	-0.39
1897	0.11	0.01	0.01	-0.08	-0.11	0.02	0.05	-0.01	-0.03	-0.37	-0.39
1898	0.12	0.01	0.01	-0.08	-0.11	0.02	0.06	-0.01	-0.04	-0.26	-0.29
1899	0.13	0.01	0.01	-0.09	-0.12	0.02	0.06	-0.01	-0.05	-0.08	-0.12
1900	0.14	0.01	0.01	-0.09	-0.13	0.03	0.06	-0.02	-0.05	-0.01	-0.05
1901	0.15	0.01	0.01	-0.10	-0.13	0.03	0.07	-0.02	-0.06	0.00	-0.04
1902	0.16	0.01	0.01	-0.10	-0.14	0.03	0.07	-0.02	-0.05	-0.45	-0.48
1903	0.17	0.02	0.01	-0.11	-0.14	0.03	0.07	-0.02	-0.01	-1.65	-1.64
1904	0.19	0.02	0.01	-0.11	-0.15	0.03	0.07	-0.02	0.04	-0.72	-0.65
1905	0.20	0.02	0.01	-0.12	-0.15	0.03	0.07	-0.02	0.01	-0.27	-0.22
1906	0.21	0.02	0.01	-0.12	-0.16	0.03	0.08	-0.02	0.04	-0.14	-0.06
1907	0.22	0.02	0.01	-0.13	-0.16	0.03	0.08	-0.02	0.02	-0.19	-0.13
1908	0.24	0.02	0.01	-0.13	-0.17	0.03	0.08	-0.02	0.02	-0.21	-0.14
1909	0.25	0.02	0.01	-0.14	-0.17	0.03	0.08	-0.02	0.00	-0.07	-0.01
1910	0.26	0.02	0.01	-0.14	-0.18	0.03	0.08	-0.03	-0.02	-0.05	-0.01
1911	0.27	0.02	0.01	-0.15	-0.18	0.03	0.09	-0.03	-0.03	-0.01	0.02
1912	0.29	0.02	0.01	-0.15	-0.19	0.03	0.09	-0.03	-0.03	-0.43	-0.39
1913	0.30	0.02	0.01	-0.16	-0.19	0.03	0.09	-0.03	-0.03	-0.54	-0.49
1914	0.30	0.02	0.01	-0.16	-0.20	0.04	0.09	-0.03	-0.01	-0.21	-0.14
1915	0.31	0.03	0.01	-0.17	-0.20	0.04	0.09	-0.03	0.04	-0.07	0.05
1916	0.32	0.03	0.01	-0.17	-0.21	0.04	0.10	-0.03	0.07	-0.04	0.11
1917	0.34	0.03	0.01	-0.18	-0.21	0.04	0.10	-0.03	0.09	-0.03	0.15
1918	0.35	0.03	0.01	-0.18	-0.22	0.04	0.10	-0.03	0.08	-0.02	0.16
1919	0.36	0.03	0.01	-0.19	-0.22	0.04	0.10	-0.03	0.05	-0.02	0.13
1920	0.37	0.03	0.01	-0.19	-0.23	0.04	0.10	-0.03	0.03	-0.19	-0.06
1921	0.38	0.03	0.01	-0.20	-0.23	0.04	0.11	-0.03	0.02	-0.15	-0.03
1922	0.40	0.03	0.01	-0.20	-0.24	0.04	0.11	-0.03	0.01	-0.04	0.08
1923	0.41	0.04	0.01	-0.21	-0.24	0.04	0.11	-0.04	0.02	0.00	0.13
1924	0.42	0.04	0.01	-0.21	-0.25	0.04	0.11	-0.04	0.02	-0.05	0.10
1925	0.43	0.04	0.01	-0.22	-0.25	0.04	0.11	-0.04	0.06	-0.04	0.15
1926	0.45	0.04	0.01	-0.22	-0.26	0.04	0.11	-0.04	0.07	-0.03	0.18
1927	0.46	0.04	0.01	-0.23	-0.26	0.04	0.12	-0.04	0.10	-0.01	0.24
1928	0.47	0.04	0.02	-0.24	-0.27	0.04	0.12	-0.04	0.08	-0.10	0.13
1929	0.49	0.04	0.02	-0.24	-0.27	0.04	0.12	-0.04	0.08	-0.21	0.03
1930	0.50	0.04	0.02	-0.25	-0.27	0.04	0.12	-0.04	0.08	-0.12	0.12
1931	0.51	0.05	0.02	-0.25	-0.28	0.04	0.12	-0.05	0.07	-0.09	0.16
1932	0.52	0.05	0.02	-0.26	-0.28	0.04	0.12	-0.05	0.06	-0.17	0.06
1933	0.54	0.05	0.02	-0.26	-0.29	0.05	0.12	-0.05	0.05	-0.13	0.10
1934	0.55	0.05	0.02	-0.27	-0.29	0.05	0.13	-0.05	0.07	-0.07	0.19
1935	0.57	0.05	0.02	-0.27	-0.29	0.05	0.13	-0.05	0.10	-0.07	0.22
1936	0.58	0.06	0.02	-0.28	-0.30	0.05	0.13	-0.05	0.15	-0.05	0.30
1937	0.59	0.06	0.02	-0.28	-0.30	0.05	0.13	-0.05	0.14	-0.04	0.31
1938	0.60	0.06	0.02	-0.29	-0.31	0.05	0.13	-0.05	0.13	-0.09	0.25
1939	0.61	0.06	0.02	-0.29	-0.31	0.05	0.13	-0.05	0.13	-0.07	0.27
1940	0.62	0.06	0.02	-0.30	-0.32	0.05	0.13	-0.05	0.13	-0.05	0.29
1941	0.62	0.06	0.02	-0.31	-0.32	0.05	0.13	-0.05	0.13	-0.02	0.31
1942	0.62	0.07	0.02	-0.31	-0.32	0.05	0.14	-0.05	0.12	-0.08	0.24
1943	0.62	0.07	0.02	-0.32	-0.33	0.05	0.14	-0.05	0.11	-0.08	0.22
1944	0.62	0.07	0.02	-0.32	-0.33	0.05	0.14	-0.06	0.12	-0.03	0.27
1945	0.62	0.07	0.02	-0.33	-0.34	0.05	0.14	-0.06	0.16	-0.03	0.32
1946	0.63	0.07	0.02	-0.33	-0.34	0.05	0.14	-0.06	0.17	-0.01	0.34
1947	0.64	0.07	0.02	-0.34	-0.35	0.05	0.14	-0.06	0.20	-0.03	0.36
1948	0.64	0.08	0.02	-0.34	-0.35	0.05	0.14	-0.06	0.23	-0.01	0.40
1949	0.66	0.08	0.02	-0.35	-0.35	0.05	0.15	-0.06	0.21	-0.05	0.36
1950	0.67	0.08	0.02	-0.35	-0.36	0.05	0.15	-0.06	0.18	-0.04	0.34
1951	0.69	0.08	0.02	-0.37	-0.37	0.05	0.15	-0.06	0.15	-0.02	0.33
1952	0.70	0.09	0.02	-0.39	-0.38	0.05	0.16	-0.06	0.15	-0.06	0.29
1953	0.72	0.09	0.03	-0.40	-0.39	0.06	0.16	-0.06	0.12	-0.05	0.28
1954	0.74	0.10	0.03	-0.42	-0.40	0.06	0.17	-0.07	0.13	-0.06	0.28
1955	0.76	0.10	0.03	-0.43	-0.41	0.06	0.17	-0.07	0.14	-0.02	0.34
1956	0.78	0.11	0.03	-0.45	-0.42	0.06	0.18	-0.07	0.22	0.00	0.44
1957	0.80	0.11	0.03	-0.46	-0.43	0.06	0.19	-0.07	0.27	0.02	0.52
1958	0.82	0.12	0.03	-0.48	-0.44	0.07	0.19	-0.07	0.27	0.02	0.52
1959	0.85	0.12	0.03	-0.49	-0.45	0.07	0.20	-0.07	0.23	0.02	0.50
1960	0.88	0.13	0.03	-0.51	-0.46	0.07	0.20	-0.08	0.22	-0.08	0.40
1961	0.90	0.13	0.03	-0.53	-0.47	0.07	0.21	-0.08	0.17	-0.23	0.21
1962	0.93	0.14	0.03	-0.54	-0.48	0.08	0.21	-0.08	0.13	-0.28	0.14
1963	0.95	0.14	0.03	-0.56	-0.49	0.08	0.22	-0.08	0.13	-1.05	-0.62
1964	0.98	0.15	0.03	-0.57	-0.50	0.08	0.23	-0.08	0.13	-1.66	-1.21
1965	1.01	0.15	0.03	-0.59	-0.51	0.08	0.23	-0.08	0.14	-0.99	-0.51
1966	1.05	0.16	0.04	-0.60	-0.52	0.09	0.24	-0.08	0.17	-0.52	0.02
1967	1.08	0.16	0.04	-0.62	-0.53	0.09	0.24	-0.08	0.20	-0.32	0.28
1968	1.12	0.17	0.04	-0.63	-0.54	0.09	0.25	-0.08	0.21	-0.62	0.01
1969	1.16	0.17	0.04	-0.65	-0.55	0.09	0.25	-0.08	0.23	-0.78	-0.11
1970	1.21	0.18	0.04	-0.66	-0.56	0.10	0.26	-0.08	0.23	-0.36	0.35
1971	1.25	0.18	0.04	-0.68	-0.56	0.10	0.26	-0.08	0.18	-0.13	0.56
1972	1.30	0.18	0.04	-0.70	-0.57	0.10	0.27	-0.08	0.19	-0.07	0.66
1973	1.36	0.19	0.04	-0.71	-0.58	0.10	0.27	-0.08	0.14	-0.16	0.57
1974	1.40	0.19	0.04	-0.73	-0.59	0.10	0.27	-0.09	0.13	-0.27	0.47
1975	1.45	0.20	0.04	-0.75	-0.60	0.10	0.28	-0.09	0.11	-0.68	0.06
1976	1.49	0.20	0.05	-0.77	-0.61	0.10	0.28	-0.09	0.13	-0.29	0.50
1977	1.55	0.21	0.05	-0.78	-0.62	0.10	0.28	-0.09	0.16	-0.09	0.77
1978	1.61	0.21	0.05	-0.80	-0.63	0.10	0.29	-0.09	0.22	-0.15	0.82
1979	1.66	0.22	0.05	-0.82	-0.63	0.10	0.29	-0.09	0.28	-0.19	0.87
1980	1.72	0.22	0.05	-0.84	-0.64	0.11	0.30	-0.09	0.28	-0.09	1.01
1981	1.78	0.22	0.05	-0.86	-0.66	0.11	0.31	-0.09	0.28	-0.09	1.05
1982	1.83	0.22	0.05	-0.88	-0.67	0.11	0.32	-0.09	0.22	-1.21	-0.10
1983	1.87	0.22	0.05	-0.91	-0.68	0.12	0.34	-0.09	0.21	-1.74	-0.62
1984	1.93	0.22	0.06	-0.94	-0.70	0.12	0.35	-0.09	0.15	-0.68	0.42
1985	1.98	0.22	0.06	-0.95	-0.70	0.13	0.36	-0.09	0.13	-0.27	0.85
1986	2.04	0.22	0.06	-0.98	-0.72	0.13	0.38	-0.09	0.13	-0.29	0.86
1987	2.10	0.22	0.06	-1.01	-0.73	0.13	0.39	-0.09	0.15	-0.22	1.00
1988	2.17	0.22	0.06	-1.03	-0.75	0.14	0.40	-0.09	0.19	-0.15	1.16
1989	2.23	0.22	0.06	-1.06	-0.76	0.14	0.42	-0.09	0.27	-0.12	1.31
1990	2.28	0.22	0.06	-1.08	-0.77	0.15	0.43	-0.09	0.26	-0.12	1.33
1991	2.32	0.22	0.06	-1.10	-0.79	0.15	0.44	-0.09	0.24	-1.24	0.21
1992	2.35	0.22	0.06	-1.12	-0.80	0.15	0.45	-0.09	0.22	-2.82	-1.38
1993	2.38	0.22	0.06	-1.13	-0.80	0.16	0.46	-0.09	0.18	-1.12	0.30
1994	2.41	0.22	0.06	-1.15	-0.82	0.16	0.47	-0.09	0.15	-0.44	0.96
1995	2.46	0.22	0.06	-1.17	-0.83	0.16	0.48	-0.09	0.14	-0.20	1.21
1996	2.49	0.22	0.06	-1.20	-0.85	0.16	0.49	-0.09	0.12	-0.13	1.29
1997	2.52	0.22	0.06	-1.21	-0.86	0.17	0.50	-0.09	0.14	-0.10	1.35
1998	2.57	0.22	0.06	-1.23	-0.87	0.17	0.51	-0.09	0.20	-0.04	1.49
1999	2.61	0.22	0.06	-1.25	-0.89	0.17	0.51	-0.09	0.24	0.00	1.59
2000	2.64	0.22	0.06	-1.27	-0.90	0.18	0.52	-0.09	0.28	0.00	1.64
2001	2.67	0.22	0.06	-1.28	-0.90	0.18	0.53	-0.09	0.26	0.00	1.64
2002	2.70	0.22	0.06	-1.29	-0.91	0.18	0.54	-0.09	0.24	0.00	1.64
2003	2.75	0.22	0.06	-1.31	-0.92	0.18	0.54	-0.09	0.22	0.00	1.65
2004	2.76	0.22	0.06	-1.32	-0.93	0.18	0.55	-0.09	0.19	-0.06	1.56
2005	2.79	0.22	0.06	-1.34	-0.94	0.19	0.55	-0.09	0.15	-0.17	1.43
2006	2.83	0.22	0.06	-1.35	-0.95	0.19	0.56	-0.09	0.14	-0.10	1.50
2007	2.87	0.22	0.06	-1.37	-0.96	0.19	0.57	-0.09	0.12	-0.05	1.55
2008	2.91	0.22	0.06	-1.38	-0.97	0.19	0.57	-0.09	0.12	-0.11	1.51
2009	2.94	0.22	0.06	-1.40	-0.99	0.20	0.58	-0.09	0.11	-0.08	1.55
2010	2.99	0.22	0.06	-1.42	-1.00	0.20	0.59	-0.09	0.13	-0.02	1.65
