# Supplementary material for: Assessing “Dangerous Climate Change”: Required Reduction of Carbon Emissions to Protect Young People, Future Generations and Nature
Source: PLoS One. 2013 Dec 3;8(12):e81648. doi: 10.1371/journal.pone.0081648 (PMC3849278; doi:10.1371/journal.pone.0081648)
Supplement: Table S3 — (ODS) [file pone.0081648.s003.ods]

## Sheet: Sheet1
	Intermediate Response Function Used in Temperature Calculations
year	Proportion of equilibrium T
1	0.15
2	0.27041
3	0.34085
4	0.39082
5	0.42959
6	0.46126
7	0.48804
8	0.51124
9	0.5317
10	0.55
11	0.55828
12	0.56584
13	0.57279
14	0.57923
15	0.58522
16	0.59082
17	0.59609
18	0.60105
19	0.60575
20	0.61021
21	0.61444
22	0.61848
23	0.62235
24	0.62604
25	0.62959
26	0.63299
27	0.63627
28	0.63943
29	0.64248
30	0.64542
31	0.64827
32	0.65103
33	0.6537
34	0.6563
35	0.65881
36	0.66126
37	0.66364
38	0.66596
39	0.66821
40	0.67041
41	0.67256
42	0.67465
43	0.67669
44	0.67869
45	0.68064
46	0.68255
47	0.68442
48	0.68625
49	0.68804
50	0.68979
51	0.69151
52	0.6932
53	0.69486
54	0.69648
55	0.69807
56	0.69964
57	0.70117
58	0.70269
59	0.70417
60	0.70563
61	0.70707
62	0.70848
63	0.70987
64	0.71124
65	0.71258
66	0.71391
67	0.71521
68	0.7165
69	0.71777
70	0.71902
71	0.72025
72	0.72147
73	0.72266
74	0.72385
75	0.72501
76	0.72616
77	0.7273
78	0.72842
79	0.72953
80	0.73062
81	0.7317
82	0.73276
83	0.73382
84	0.73486
85	0.73588
86	0.7369
87	0.7379
88	0.7389
89	0.73988
90	0.74085
91	0.74181
92	0.74276
93	0.7437
94	0.74463
95	0.74554
96	0.74645
97	0.74735
98	0.74825
99	0.74913
100	0.75
101	0.75083
102	0.75165
103	0.75247
104	0.75327
105	0.75407
106	0.75486
107	0.75565
108	0.75642
109	0.75719
110	0.75795
111	0.75871
112	0.75946
113	0.7602
114	0.76093
115	0.76166
116	0.76239
117	0.7631
118	0.76381
119	0.76452
120	0.76522
121	0.76591
122	0.76659
123	0.76728
124	0.76795
125	0.76862
126	0.76929
127	0.76995
128	0.7706
129	0.77125
130	0.7719
131	0.77253
132	0.77317
133	0.7738
134	0.77442
135	0.77504
136	0.77566
137	0.77627
138	0.77688
139	0.77748
140	0.77808
141	0.77867
142	0.77926
143	0.77985
144	0.78043
145	0.78101
146	0.78158
147	0.78215
148	0.78272
149	0.78328
150	0.78384
151	0.78439
152	0.78494
153	0.78549
154	0.78603
155	0.78657
156	0.78711
157	0.78764
158	0.78817
159	0.7887
160	0.78922
161	0.78974
162	0.79026
163	0.79077
164	0.79128
165	0.79179
166	0.7923
167	0.7928
168	0.7933
169	0.79379
170	0.79428
171	0.79477
172	0.79526
173	0.79574
174	0.79622
175	0.7967
176	0.79718
177	0.79765
178	0.79812
179	0.79859
180	0.79905
181	0.79952
182	0.79998
183	0.80043
184	0.80089
185	0.80134
186	0.80179
187	0.80224
188	0.80268
189	0.80312
190	0.80357
191	0.804
192	0.80444
193	0.80487
194	0.8053
195	0.80573
196	0.80616
197	0.80658
198	0.80701
199	0.80743
200	0.80785
201	0.80826
202	0.80868
203	0.80909
204	0.8095
205	0.80991
206	0.81031
207	0.81072
208	0.81112
209	0.81152
210	0.81192
211	0.81231
212	0.81271
213	0.8131
214	0.81349
215	0.81388
216	0.81427
217	0.81465
218	0.81504
219	0.81542
220	0.8158
221	0.81618
222	0.81656
223	0.81693
224	0.8173
225	0.81768
226	0.81805
227	0.81841
228	0.81878
229	0.81915
230	0.81951
231	0.81987
232	0.82023
233	0.82059
234	0.82095
235	0.8213
236	0.82166
237	0.82201
238	0.82236
239	0.82271
240	0.82306
241	0.82341
242	0.82375
243	0.8241
244	0.82444
245	0.82478
246	0.82512
247	0.82546
248	0.8258
249	0.82613
250	0.82647
251	0.8268
252	0.82713
253	0.82746
254	0.82779
255	0.82812
256	0.82845
257	0.82877
258	0.8291
259	0.82942
260	0.82974
261	0.83006
262	0.83038
263	0.8307
264	0.83102
265	0.83133
266	0.83165
267	0.83196
268	0.83227
269	0.83258
270	0.83289
271	0.8332
272	0.83351
273	0.83381
274	0.83412
275	0.83442
276	0.83473
277	0.83503
278	0.83533
279	0.83563
280	0.83593
281	0.83622
282	0.83652
283	0.83682
284	0.83711
285	0.8374
286	0.8377
287	0.83799
288	0.83828
289	0.83857
290	0.83885
291	0.83914
292	0.83943
293	0.83971
294	0.84
295	0.84028
296	0.84056
297	0.84084
298	0.84113
299	0.84141
300	0.84168
301	0.84196
302	0.84224
303	0.84251
304	0.84279
305	0.84306
306	0.84334
307	0.84361
308	0.84388
309	0.84415
310	0.84442
311	0.84469
312	0.84496
313	0.84522
314	0.84549
315	0.84576
316	0.84602
317	0.84628
318	0.84655
319	0.84681
320	0.84707
321	0.84733
322	0.84759
323	0.84785
324	0.84811
325	0.84836
326	0.84862
327	0.84888
328	0.84913
329	0.84938
330	0.84964
331	0.84989
332	0.85014
333	0.85039
334	0.85064
335	0.85089
336	0.85114
337	0.85139
338	0.85164
339	0.85188
340	0.85213
341	0.85237
342	0.85262
343	0.85286
344	0.85311
345	0.85335
346	0.85359
347	0.85383
348	0.85407
349	0.85431
350	0.85455
351	0.85479
352	0.85502
353	0.85526
354	0.8555
355	0.85573
356	0.85597
357	0.8562
358	0.85643
359	0.85667
360	0.8569
361	0.85713
362	0.85736
363	0.85759
364	0.85782
365	0.85805
366	0.85828
367	0.85851
368	0.85873
369	0.85896
370	0.85919
371	0.85941
372	0.85964
373	0.85986
374	0.86008
375	0.86031
376	0.86053
377	0.86075
378	0.86097
379	0.86119
380	0.86141
381	0.86163
382	0.86185
383	0.86207
384	0.86229
385	0.8625
386	0.86272
387	0.86293
388	0.86315
389	0.86336
390	0.86358
391	0.86379
392	0.86401
393	0.86422
394	0.86443
395	0.86464
396	0.86485
397	0.86506
398	0.86527
399	0.86548
400	0.86569
401	0.8659
402	0.86611
403	0.86632
404	0.86652
405	0.86673
406	0.86693
407	0.86714
408	0.86734
409	0.86755
410	0.86775
411	0.86796
412	0.86816
413	0.86836
414	0.86856
415	0.86876
416	0.86897
417	0.86917
418	0.86937
419	0.86956
420	0.86976
421	0.86996
422	0.87016
423	0.87036
424	0.87055
425	0.87075
426	0.87095
427	0.87114
428	0.87134
429	0.87153
430	0.87173
431	0.87192
432	0.87211
433	0.87231
434	0.8725
435	0.87269
436	0.87288
437	0.87307
438	0.87327
439	0.87346
440	0.87365
441	0.87384
442	0.87402
443	0.87421
444	0.8744
445	0.87459
446	0.87478
447	0.87496
448	0.87515
449	0.87534
450	0.87552
451	0.87571
452	0.87589
453	0.87608
454	0.87626
455	0.87644
456	0.87663
457	0.87681
458	0.87699
459	0.87717
460	0.87736
461	0.87754
462	0.87772
463	0.8779
464	0.87808
465	0.87826
466	0.87844
467	0.87862
468	0.87879
469	0.87897
470	0.87915
471	0.87933
472	0.8795
473	0.87968
474	0.87986
475	0.88003
476	0.88021
477	0.88038
478	0.88056
479	0.88073
480	0.88091
481	0.88108
482	0.88125
483	0.88143
484	0.8816
485	0.88177
486	0.88194
487	0.88212
488	0.88229
489	0.88246
490	0.88263
491	0.8828
492	0.88297
493	0.88314
494	0.88331
495	0.88348
496	0.88364
497	0.88381
498	0.88398
499	0.88415
500	0.88431
501	0.88448
502	0.88465
503	0.88481
504	0.88498
505	0.88514
506	0.88531
507	0.88547
508	0.88564
509	0.8858
510	0.88597
511	0.88613
512	0.88629
513	0.88646
514	0.88662
515	0.88678
516	0.88694
517	0.8871
518	0.88727
519	0.88743
520	0.88759
521	0.88775
522	0.88791
523	0.88807
524	0.88823
525	0.88839
526	0.88854
527	0.8887
528	0.88886
529	0.88902
530	0.88918
531	0.88933
532	0.88949
533	0.88965
534	0.8898
535	0.88996
536	0.89012
537	0.89027
538	0.89043
539	0.89058
540	0.89074
541	0.89089
542	0.89105
543	0.8912
544	0.89135
545	0.89151
546	0.89166
547	0.89181
548	0.89196
549	0.89212
550	0.89227
551	0.89242
552	0.89257
553	0.89272
554	0.89287
555	0.89302
556	0.89317
557	0.89332
558	0.89347
559	0.89362
560	0.89377
561	0.89392
562	0.89407
563	0.89422
564	0.89437
565	0.89451
566	0.89466
567	0.89481
568	0.89496
569	0.8951
570	0.89525
571	0.8954
572	0.89554
573	0.89569
574	0.89583
575	0.89598
576	0.89612
577	0.89627
578	0.89641
579	0.89656
580	0.8967
581	0.89684
582	0.89699
583	0.89713
584	0.89727
585	0.89742
586	0.89756
587	0.8977
588	0.89784
589	0.89799
590	0.89813
591	0.89827
592	0.89841
593	0.89855
594	0.89869
595	0.89883
596	0.89897
597	0.89911
598	0.89925
599	0.89939
600	0.89953
601	0.89967
602	0.89981
603	0.89995
604	0.90008
605	0.90022
606	0.90036
607	0.9005
608	0.90063
609	0.90077
610	0.90091
611	0.90105
612	0.90118
613	0.90132
614	0.90145
615	0.90159
616	0.90173
617	0.90186
618	0.902
619	0.90213
620	0.90227
621	0.9024
622	0.90253
623	0.90267
624	0.9028
625	0.90294
626	0.90307
627	0.9032
628	0.90334
629	0.90347
630	0.9036
631	0.90373
632	0.90387
633	0.904
634	0.90413
635	0.90426
636	0.90439
637	0.90452
638	0.90465
639	0.90479
640	0.90492
641	0.90505
642	0.90518
643	0.90531
644	0.90544
645	0.90557
646	0.90569
647	0.90582
648	0.90595
649	0.90608
650	0.90621
651	0.90634
652	0.90647
653	0.90659
654	0.90672
655	0.90685
656	0.90698
657	0.9071
658	0.90723
659	0.90736
660	0.90748
661	0.90761
662	0.90774
663	0.90786
664	0.90799
665	0.90811
666	0.90824
667	0.90836
668	0.90849
669	0.90861
670	0.90874
671	0.90886
672	0.90899
673	0.90911
674	0.90924
675	0.90936
676	0.90948
677	0.90961
678	0.90973
679	0.90985
680	0.90997
681	0.9101
682	0.91022
683	0.91034
684	0.91046
685	0.91059
686	0.91071
687	0.91083
688	0.91095
689	0.91107
690	0.91119
691	0.91131
692	0.91143
693	0.91156
694	0.91168
695	0.9118
696	0.91192
697	0.91204
698	0.91216
699	0.91227
700	0.91239
701	0.91251
702	0.91263
703	0.91275
704	0.91287
705	0.91299
706	0.91311
707	0.91322
708	0.91334
709	0.91346
710	0.91358
711	0.9137
712	0.91381
713	0.91393
714	0.91405
715	0.91416
716	0.91428
717	0.9144
718	0.91451
719	0.91463
720	0.91474
721	0.91486
722	0.91498
723	0.91509
724	0.91521
725	0.91532
726	0.91544
727	0.91555
728	0.91567
729	0.91578
730	0.9159
731	0.91601
732	0.91612
733	0.91624
734	0.91635
735	0.91647
736	0.91658
737	0.91669
738	0.91681
739	0.91692
740	0.91703
741	0.91714
742	0.91726
743	0.91737
744	0.91748
745	0.91759
746	0.91771
747	0.91782
748	0.91793
749	0.91804
750	0.91815
751	0.91826
752	0.91837
753	0.91848
754	0.9186
755	0.91871
756	0.91882
757	0.91893
758	0.91904
759	0.91915
760	0.91926
761	0.91937
762	0.91948
763	0.91959
764	0.9197
765	0.9198
766	0.91991
767	0.92002
768	0.92013
769	0.92024
770	0.92035
771	0.92046
772	0.92056
773	0.92067
774	0.92078
775	0.92089
776	0.921
777	0.9211
778	0.92121
779	0.92132
780	0.92142
781	0.92153
782	0.92164
783	0.92175
784	0.92185
785	0.92196
786	0.92206
787	0.92217
788	0.92228
789	0.92238
790	0.92249
791	0.92259
792	0.9227
793	0.9228
794	0.92291
795	0.92301
796	0.92312
797	0.92322
798	0.92333
799	0.92343
800	0.92354
801	0.92364
802	0.92375
803	0.92385
804	0.92395
805	0.92406
806	0.92416
807	0.92426
808	0.92437
809	0.92447
810	0.92457
811	0.92468
812	0.92478
813	0.92488
814	0.92499
815	0.92509
816	0.92519
817	0.92529
818	0.92539
819	0.9255
820	0.9256
821	0.9257
822	0.9258
823	0.9259
824	0.926
825	0.92611
826	0.92621
827	0.92631
828	0.92641
829	0.92651
830	0.92661
831	0.92671
832	0.92681
833	0.92691
834	0.92701
835	0.92711
836	0.92721
837	0.92731
838	0.92741
839	0.92751
840	0.92761
841	0.92771
842	0.92781
843	0.92791
844	0.92801
845	0.9281
846	0.9282
847	0.9283
848	0.9284
849	0.9285
850	0.9286
851	0.9287
852	0.92879
853	0.92889
854	0.92899
855	0.92909
856	0.92918
857	0.92928
858	0.92938
859	0.92948
860	0.92957
861	0.92967
862	0.92977
863	0.92986
864	0.92996
865	0.93006
866	0.93015
867	0.93025
868	0.93035
869	0.93044
870	0.93054
871	0.93063
872	0.93073
873	0.93083
874	0.93092
875	0.93102
876	0.93111
877	0.93121
878	0.9313
879	0.9314
880	0.93149
881	0.93159
882	0.93168
883	0.93178
884	0.93187
885	0.93196
886	0.93206
887	0.93215
888	0.93225
889	0.93234
890	0.93243
891	0.93253
892	0.93262
893	0.93272
894	0.93281
895	0.9329
896	0.933
897	0.93309
898	0.93318
899	0.93327
900	0.93337
901	0.93346
902	0.93355
903	0.93365
904	0.93374
905	0.93383
906	0.93392
907	0.93401
908	0.93411
909	0.9342
910	0.93429
911	0.93438
912	0.93447
913	0.93456
914	0.93466
915	0.93475
916	0.93484
917	0.93493
918	0.93502
919	0.93511
920	0.9352
921	0.93529
922	0.93538
923	0.93547
924	0.93556
925	0.93565
926	0.93574
927	0.93583
928	0.93592
929	0.93601
930	0.9361
931	0.93619
932	0.93628
933	0.93637
934	0.93646
935	0.93655
936	0.93664
937	0.93673
938	0.93682
939	0.93691
940	0.937
941	0.93709
942	0.93717
943	0.93726
944	0.93735
945	0.93744
946	0.93753
947	0.93762
948	0.9377
949	0.93779
950	0.93788
951	0.93797
952	0.93805
953	0.93814
954	0.93823
955	0.93832
956	0.9384
957	0.93849
958	0.93858
959	0.93867
960	0.93875
961	0.93884
962	0.93893
963	0.93901
964	0.9391
965	0.93919
966	0.93927
967	0.93936
968	0.93945
969	0.93953
970	0.93962
971	0.9397
972	0.93979
973	0.93988
974	0.93996
975	0.94005
976	0.94013
977	0.94022
978	0.9403
979	0.94039
980	0.94047
981	0.94056
982	0.94064
983	0.94073
984	0.94081
985	0.9409
986	0.94098
987	0.94107
988	0.94115
989	0.94124
990	0.94132
991	0.94141
992	0.94149
993	0.94157
994	0.94166
995	0.94174
996	0.94183
997	0.94191
998	0.94199
999	0.94208
1000	0.94216
1001	0.94224
1002	0.94233
1003	0.94241
1004	0.94249
1005	0.94258
1006	0.94266
1007	0.94274
1008	0.94282
1009	0.94291
1010	0.94299
1011	0.94307
1012	0.94316
1013	0.94324
1014	0.94332
1015	0.9434
1016	0.94348
1017	0.94357
1018	0.94365
1019	0.94373
1020	0.94381
1021	0.94389
1022	0.94398
1023	0.94406
1024	0.94414
1025	0.94422
1026	0.9443
1027	0.94438
1028	0.94446
1029	0.94455
1030	0.94463
1031	0.94471
1032	0.94479
1033	0.94487
1034	0.94495
1035	0.94503
1036	0.94511
1037	0.94519
1038	0.94527
1039	0.94535
1040	0.94543
1041	0.94551
1042	0.94559
1043	0.94567
1044	0.94575
1045	0.94583
1046	0.94591
1047	0.94599
1048	0.94607
1049	0.94615
1050	0.94623
1051	0.94631
1052	0.94639
1053	0.94647
1054	0.94655
1055	0.94663
1056	0.94671
1057	0.94679
1058	0.94687
1059	0.94694
1060	0.94702
1061	0.9471
1062	0.94718
1063	0.94726
1064	0.94734
1065	0.94742
1066	0.94749
1067	0.94757
1068	0.94765
1069	0.94773
1070	0.94781
1071	0.94788
1072	0.94796
1073	0.94804
1074	0.94812
1075	0.9482
1076	0.94827
1077	0.94835
1078	0.94843
1079	0.94851
1080	0.94858
1081	0.94866
1082	0.94874
1083	0.94881
1084	0.94889
1085	0.94897
1086	0.94905
1087	0.94912
1088	0.9492
1089	0.94928
1090	0.94935
1091	0.94943
1092	0.9495
1093	0.94958
1094	0.94966
1095	0.94973
1096	0.94981
1097	0.94989
1098	0.94996
1099	0.95004
1100	0.95011
1101	0.95019
1102	0.95027
1103	0.95034
1104	0.95042
1105	0.95049
1106	0.95057
1107	0.95064
1108	0.95072
1109	0.95079
1110	0.95087
1111	0.95094
1112	0.95102
1113	0.95109
1114	0.95117
1115	0.95124
1116	0.95132
1117	0.95139
1118	0.95147
1119	0.95154
1120	0.95162
1121	0.95169
1122	0.95177
1123	0.95184
1124	0.95192
1125	0.95199
1126	0.95206
1127	0.95214
1128	0.95221
1129	0.95229
1130	0.95236
1131	0.95243
1132	0.95251
1133	0.95258
1134	0.95265
1135	0.95273
1136	0.9528
1137	0.95287
1138	0.95295
1139	0.95302
1140	0.95309
1141	0.95317
1142	0.95324
1143	0.95331
1144	0.95339
1145	0.95346
1146	0.95353
1147	0.95361
1148	0.95368
1149	0.95375
1150	0.95382
1151	0.9539
1152	0.95397
1153	0.95404
1154	0.95411
1155	0.95419
1156	0.95426
1157	0.95433
1158	0.9544
1159	0.95447
1160	0.95455
1161	0.95462
1162	0.95469
1163	0.95476
1164	0.95483
1165	0.95491
1166	0.95498
1167	0.95505
1168	0.95512
1169	0.95519
1170	0.95526
1171	0.95533
1172	0.95541
1173	0.95548
1174	0.95555
1175	0.95562
1176	0.95569
1177	0.95576
1178	0.95583
1179	0.9559
1180	0.95597
1181	0.95604
1182	0.95611
1183	0.95618
1184	0.95626
1185	0.95633
1186	0.9564
1187	0.95647
1188	0.95654
1189	0.95661
1190	0.95668
1191	0.95675
1192	0.95682
1193	0.95689
1194	0.95696
1195	0.95703
1196	0.9571
1197	0.95717
1198	0.95724
1199	0.95731
1200	0.95738
1201	0.95745
1202	0.95751
1203	0.95758
1204	0.95765
1205	0.95772
1206	0.95779
1207	0.95786
1208	0.95793
1209	0.958
1210	0.95807
1211	0.95814
1212	0.95821
1213	0.95827
1214	0.95834
1215	0.95841
1216	0.95848
1217	0.95855
1218	0.95862
1219	0.95869
1220	0.95875
1221	0.95882
1222	0.95889
1223	0.95896
1224	0.95903
1225	0.9591
1226	0.95916
1227	0.95923
1228	0.9593
1229	0.95937
1230	0.95944
1231	0.9595
1232	0.95957
1233	0.95964
1234	0.95971
1235	0.95977
1236	0.95984
1237	0.95991
1238	0.95998
1239	0.96004
1240	0.96011
1241	0.96018
1242	0.96025
1243	0.96031
1244	0.96038
1245	0.96045
1246	0.96051
1247	0.96058
1248	0.96065
1249	0.96072
1250	0.96078
1251	0.96085
1252	0.96092
1253	0.96098
1254	0.96105
1255	0.96112
1256	0.96118
1257	0.96125
1258	0.96131
1259	0.96138
1260	0.96145
1261	0.96151
1262	0.96158
1263	0.96165
1264	0.96171
1265	0.96178
1266	0.96184
1267	0.96191
1268	0.96198
1269	0.96204
1270	0.96211
1271	0.96217
1272	0.96224
1273	0.9623
1274	0.96237
1275	0.96243
1276	0.9625
1277	0.96257
1278	0.96263
1279	0.9627
1280	0.96276
1281	0.96283
1282	0.96289
1283	0.96296
1284	0.96302
1285	0.96309
1286	0.96315
1287	0.96322
1288	0.96328
1289	0.96335
1290	0.96341
1291	0.96348
1292	0.96354
1293	0.9636
1294	0.96367
1295	0.96373
1296	0.9638
1297	0.96386
1298	0.96393
1299	0.96399
1300	0.96406
1301	0.96412
1302	0.96418
1303	0.96425
1304	0.96431
1305	0.96438
1306	0.96444
1307	0.9645
1308	0.96457
1309	0.96463
1310	0.96469
1311	0.96476
1312	0.96482
1313	0.96489
1314	0.96495
1315	0.96501
1316	0.96508
1317	0.96514
1318	0.9652
1319	0.96527
1320	0.96533
1321	0.96539
1322	0.96546
1323	0.96552
1324	0.96558
1325	0.96565
1326	0.96571
1327	0.96577
1328	0.96583
1329	0.9659
1330	0.96596
1331	0.96602
1332	0.96608
1333	0.96615
1334	0.96621
1335	0.96627
1336	0.96633
1337	0.9664
1338	0.96646
1339	0.96652
1340	0.96658
1341	0.96665
1342	0.96671
1343	0.96677
1344	0.96683
1345	0.9669
1346	0.96696
1347	0.96702
1348	0.96708
1349	0.96714
1350	0.9672
1351	0.96727
1352	0.96733
1353	0.96739
1354	0.96745
1355	0.96751
1356	0.96757
1357	0.96764
1358	0.9677
1359	0.96776
1360	0.96782
1361	0.96788
1362	0.96794
1363	0.968
1364	0.96807
1365	0.96813
1366	0.96819
1367	0.96825
1368	0.96831
1369	0.96837
1370	0.96843
1371	0.96849
1372	0.96855
1373	0.96861
1374	0.96868
1375	0.96874
1376	0.9688
1377	0.96886
1378	0.96892
1379	0.96898
1380	0.96904
1381	0.9691
1382	0.96916
1383	0.96922
1384	0.96928
1385	0.96934
1386	0.9694
1387	0.96946
1388	0.96952
1389	0.96958
1390	0.96964
1391	0.9697
1392	0.96976
1393	0.96982
1394	0.96988
1395	0.96994
1396	0.97
1397	0.97006
1398	0.97012
1399	0.97018
1400	0.97024
1401	0.9703
1402	0.97036
1403	0.97042
1404	0.97048
1405	0.97054
1406	0.9706
1407	0.97066
1408	0.97072
1409	0.97077
1410	0.97083
1411	0.97089
1412	0.97095
1413	0.97101
1414	0.97107
1415	0.97113
1416	0.97119
1417	0.97125
1418	0.97131
1419	0.97136
1420	0.97142
1421	0.97148
1422	0.97154
1423	0.9716
1424	0.97166
1425	0.97172
1426	0.97178
1427	0.97183
1428	0.97189
1429	0.97195
1430	0.97201
1431	0.97207
1432	0.97213
1433	0.97218
1434	0.97224
1435	0.9723
1436	0.97236
1437	0.97242
1438	0.97247
1439	0.97253
1440	0.97259
1441	0.97265
1442	0.97271
1443	0.97276
1444	0.97282
1445	0.97288
1446	0.97294
1447	0.973
1448	0.97305
1449	0.97311
1450	0.97317
1451	0.97323
1452	0.97328
1453	0.97334
1454	0.9734
1455	0.97346
1456	0.97351
1457	0.97357
1458	0.97363
1459	0.97368
1460	0.97374
1461	0.9738
1462	0.97386
1463	0.97391
1464	0.97397
1465	0.97403
1466	0.97408
1467	0.97414
1468	0.9742
1469	0.97425
1470	0.97431
1471	0.97437
1472	0.97443
1473	0.97448
1474	0.97454
1475	0.9746
1476	0.97465
1477	0.97471
1478	0.97476
1479	0.97482
1480	0.97488
1481	0.97493
1482	0.97499
1483	0.97505
1484	0.9751
1485	0.97516
1486	0.97522
1487	0.97527
1488	0.97533
1489	0.97538
1490	0.97544
1491	0.9755
1492	0.97555
1493	0.97561
1494	0.97566
1495	0.97572
1496	0.97577
1497	0.97583
1498	0.97589
1499	0.97594
1500	0.976
1501	0.97605
1502	0.97611
1503	0.97616
1504	0.97622
1505	0.97628
1506	0.97633
1507	0.97639
1508	0.97644
1509	0.9765
1510	0.97655
1511	0.97661
1512	0.97666
1513	0.97672
1514	0.97677
1515	0.97683
1516	0.97688
1517	0.97694
1518	0.97699
1519	0.97705
1520	0.9771
1521	0.97716
1522	0.97721
1523	0.97727
1524	0.97732
1525	0.97738
1526	0.97743
1527	0.97749
1528	0.97754
1529	0.9776
1530	0.97765
1531	0.9777
1532	0.97776
1533	0.97781
1534	0.97787
1535	0.97792
1536	0.97798
1537	0.97803
1538	0.97809
1539	0.97814
1540	0.97819
1541	0.97825
1542	0.9783
1543	0.97836
1544	0.97841
1545	0.97846
1546	0.97852
1547	0.97857
1548	0.97863
1549	0.97868
1550	0.97873
1551	0.97879
1552	0.97884
1553	0.9789
1554	0.97895
1555	0.979
1556	0.97906
1557	0.97911
1558	0.97916
1559	0.97922
1560	0.97927
1561	0.97932
1562	0.97938
1563	0.97943
1564	0.97948
1565	0.97954
1566	0.97959
1567	0.97964
1568	0.9797
1569	0.97975
1570	0.9798
1571	0.97986
1572	0.97991
1573	0.97996
1574	0.98002
1575	0.98007
1576	0.98012
1577	0.98018
1578	0.98023
1579	0.98028
1580	0.98033
1581	0.98039
1582	0.98044
1583	0.98049
1584	0.98054
1585	0.9806
1586	0.98065
1587	0.9807
1588	0.98076
1589	0.98081
1590	0.98086
1591	0.98091
1592	0.98097
1593	0.98102
1594	0.98107
1595	0.98112
1596	0.98117
1597	0.98123
1598	0.98128
1599	0.98133
1600	0.98138
1601	0.98144
1602	0.98149
1603	0.98154
1604	0.98159
1605	0.98164
1606	0.9817
1607	0.98175
1608	0.9818
1609	0.98185
1610	0.9819
1611	0.98196
1612	0.98201
1613	0.98206
1614	0.98211
1615	0.98216
1616	0.98221
1617	0.98227
1618	0.98232
1619	0.98237
1620	0.98242
1621	0.98247
1622	0.98252
1623	0.98257
1624	0.98263
1625	0.98268
1626	0.98273
1627	0.98278
1628	0.98283
1629	0.98288
1630	0.98293
1631	0.98299
1632	0.98304
1633	0.98309
1634	0.98314
1635	0.98319
1636	0.98324
1637	0.98329
1638	0.98334
1639	0.98339
1640	0.98344
1641	0.9835
1642	0.98355
1643	0.9836
1644	0.98365
1645	0.9837
1646	0.98375
1647	0.9838
1648	0.98385
1649	0.9839
1650	0.98395
1651	0.984
1652	0.98405
1653	0.9841
1654	0.98415
1655	0.9842
1656	0.98425
1657	0.98431
1658	0.98436
1659	0.98441
1660	0.98446
1661	0.98451
1662	0.98456
1663	0.98461
1664	0.98466
1665	0.98471
1666	0.98476
1667	0.98481
1668	0.98486
1669	0.98491
1670	0.98496
1671	0.98501
1672	0.98506
1673	0.98511
1674	0.98516
1675	0.98521
1676	0.98526
1677	0.98531
1678	0.98536
1679	0.98541
1680	0.98546
1681	0.98551
1682	0.98555
1683	0.9856
1684	0.98565
1685	0.9857
1686	0.98575
1687	0.9858
1688	0.98585
1689	0.9859
1690	0.98595
1691	0.986
1692	0.98605
1693	0.9861
1694	0.98615
1695	0.9862
1696	0.98625
1697	0.9863
1698	0.98634
1699	0.98639
1700	0.98644
1701	0.98649
1702	0.98654
1703	0.98659
1704	0.98664
1705	0.98669
1706	0.98674
1707	0.98679
1708	0.98683
1709	0.98688
1710	0.98693
1711	0.98698
1712	0.98703
1713	0.98708
1714	0.98713
1715	0.98718
1716	0.98722
1717	0.98727
1718	0.98732
1719	0.98737
1720	0.98742
1721	0.98747
1722	0.98752
1723	0.98756
1724	0.98761
1725	0.98766
1726	0.98771
1727	0.98776
1728	0.98781
1729	0.98785
1730	0.9879
1731	0.98795
1732	0.988
1733	0.98805
1734	0.9881
1735	0.98814
1736	0.98819
1737	0.98824
1738	0.98829
1739	0.98834
1740	0.98838
1741	0.98843
1742	0.98848
1743	0.98853
1744	0.98858
1745	0.98862
1746	0.98867
1747	0.98872
1748	0.98877
1749	0.98881
1750	0.98886
1751	0.98891
1752	0.98896
1753	0.98901
1754	0.98905
1755	0.9891
1756	0.98915
1757	0.9892
1758	0.98924
1759	0.98929
1760	0.98934
1761	0.98939
1762	0.98943
1763	0.98948
1764	0.98953
1765	0.98957
1766	0.98962
1767	0.98967
1768	0.98972
1769	0.98976
1770	0.98981
1771	0.98986
1772	0.9899
1773	0.98995
1774	0.99
1775	0.99005
1776	0.99009
1777	0.99014
1778	0.99019
1779	0.99023
1780	0.99028
1781	0.99033
1782	0.99037
1783	0.99042
1784	0.99047
1785	0.99051
1786	0.99056
1787	0.99061
1788	0.99065
1789	0.9907
1790	0.99075
1791	0.99079
1792	0.99084
1793	0.99089
1794	0.99093
1795	0.99098
1796	0.99103
1797	0.99107
1798	0.99112
1799	0.99117
1800	0.99121
1801	0.99126
1802	0.99131
1803	0.99135
1804	0.9914
1805	0.99144
1806	0.99149
1807	0.99154
1808	0.99158
1809	0.99163
1810	0.99168
1811	0.99172
1812	0.99177
1813	0.99181
1814	0.99186
1815	0.99191
1816	0.99195
1817	0.992
1818	0.99204
1819	0.99209
1820	0.99214
1821	0.99218
1822	0.99223
1823	0.99227
1824	0.99232
1825	0.99236
1826	0.99241
1827	0.99246
1828	0.9925
1829	0.99255
1830	0.99259
1831	0.99264
1832	0.99268
1833	0.99273
1834	0.99277
1835	0.99282
1836	0.99287
1837	0.99291
1838	0.99296
1839	0.993
1840	0.99305
1841	0.99309
1842	0.99314
1843	0.99318
1844	0.99323
1845	0.99327
1846	0.99332
1847	0.99336
1848	0.99341
1849	0.99345
1850	0.9935
1851	0.99354
1852	0.99359
1853	0.99363
1854	0.99368
1855	0.99372
1856	0.99377
1857	0.99381
1858	0.99386
1859	0.9939
1860	0.99395
1861	0.99399
1862	0.99404
1863	0.99408
1864	0.99413
1865	0.99417
1866	0.99422
1867	0.99426
1868	0.99431
1869	0.99435
1870	0.9944
1871	0.99444
1872	0.99449
1873	0.99453
1874	0.99458
1875	0.99462
1876	0.99466
1877	0.99471
1878	0.99475
1879	0.9948
1880	0.99484
1881	0.99489
1882	0.99493
1883	0.99498
1884	0.99502
1885	0.99506
1886	0.99511
1887	0.99515
1888	0.9952
1889	0.99524
1890	0.99528
1891	0.99533
1892	0.99537
1893	0.99542
1894	0.99546
1895	0.99551
1896	0.99555
1897	0.99559
1898	0.99564
1899	0.99568
1900	0.99573
1901	0.99577
1902	0.99581
1903	0.99586
1904	0.9959
1905	0.99594
1906	0.99599
1907	0.99603
1908	0.99608
1909	0.99612
1910	0.99616
1911	0.99621
1912	0.99625
1913	0.99629
1914	0.99634
1915	0.99638
1916	0.99643
1917	0.99647
1918	0.99651
1919	0.99656
1920	0.9966
1921	0.99664
1922	0.99669
1923	0.99673
1924	0.99677
1925	0.99682
1926	0.99686
1927	0.9969
1928	0.99695
1929	0.99699
1930	0.99703
1931	0.99708
1932	0.99712
1933	0.99716
1934	0.99721
1935	0.99725
1936	0.99729
1937	0.99733
1938	0.99738
1939	0.99742
1940	0.99746
1941	0.99751
1942	0.99755
1943	0.99759
1944	0.99764
1945	0.99768
1946	0.99772
1947	0.99776
1948	0.99781
1949	0.99785
1950	0.99789
1951	0.99794
1952	0.99798
1953	0.99802
1954	0.99806
1955	0.99811
1956	0.99815
1957	0.99819
1958	0.99823
1959	0.99828
1960	0.99832
1961	0.99836
1962	0.9984
1963	0.99845
1964	0.99849
1965	0.99853
1966	0.99857
1967	0.99862
1968	0.99866
1969	0.9987
1970	0.99874
1971	0.99879
1972	0.99883
1973	0.99887
1974	0.99891
1975	0.99896
1976	0.999
1977	0.99904
1978	0.99908
1979	0.99913
1980	0.99917
1981	0.99921
1982	0.99925
1983	0.99929
1984	0.99934
1985	0.99938
1986	0.99942
1987	0.99946
1988	0.9995
1989	0.99955
1990	0.99959
1991	0.99963
1992	0.99967
1993	0.99971
1994	0.99976
1995	0.9998
1996	0.99984
1997	0.99988
1998	0.99992
[truncated: 2 more rows]
